# Supplementary material for: Development of Novel pH-Sensitive Eudragit Coated Beads Containing Curcumin-Mesalamine Combination for Colon-Specific Drug Delivery
Source: MDPI journal article supplement (doi:10.3390/gels9040264), 2023-03-23
Supplement: s1 [file s1]

## Supplementary Information

# Development of Novel pH-Sensitive Eudragit Coated Beads Containing Curcumin-Mesalamine Combination for Colon-Specific Drug Delivery

Eman J. Heikal<sup>1,2</sup>, Rashad M. Kaoud<sup>3</sup>, Shadeed Gad<sup>1</sup>, Hatem I. Mokhtar<sup>4</sup>, Abdullah Alattar<sup>5</sup>, Reem Alshaman<sup>5</sup>, Sawsan A. Zaitone<sup>5,6</sup>, Yasser M. Moustafa<sup>6,7</sup> and Taha M. Hammady<sup>1</sup>

<sup>1</sup>Department of Pharmaceutics and Industrial Pharmacy, Faculty of Pharmacy, Suez Canal University, Ismailia, Egypt

<sup>2</sup>Faculty of Pharmacy, The University of Mashreq, Baghdad, Iraq

<sup>3</sup>Pharmacy Department, Ashur University College, PO Box 10047, Baghdad, Iraq

<sup>4</sup>Department of Pharmaceutical Chemistry, Faculty of Pharmacy, Sinai University-Kantara Branch, Ismailia 41636, Egypt

<sup>5</sup>Department of Pharmacology & Toxicology, Faculty of Pharmacy, University of Tabuk, Tabuk 71491, Saudi Arabia

<sup>6</sup>Department of Pharmacology and Toxicology, Faculty of Pharmacy, Suez Canal University, Ismailia 41522, Egypt. Sawsan\_zaytoon@pharm.suez.edu.eg

<sup>7</sup>Department of Pharmacology and Toxicology, Faculty of Pharmacy, Badr University in Cairo, Cairo 11829, Egypt.

\* Correspondence: author:

shaded\_abdelrahman@pharm.suez.edu.eg, Tel: 002-01003934422.

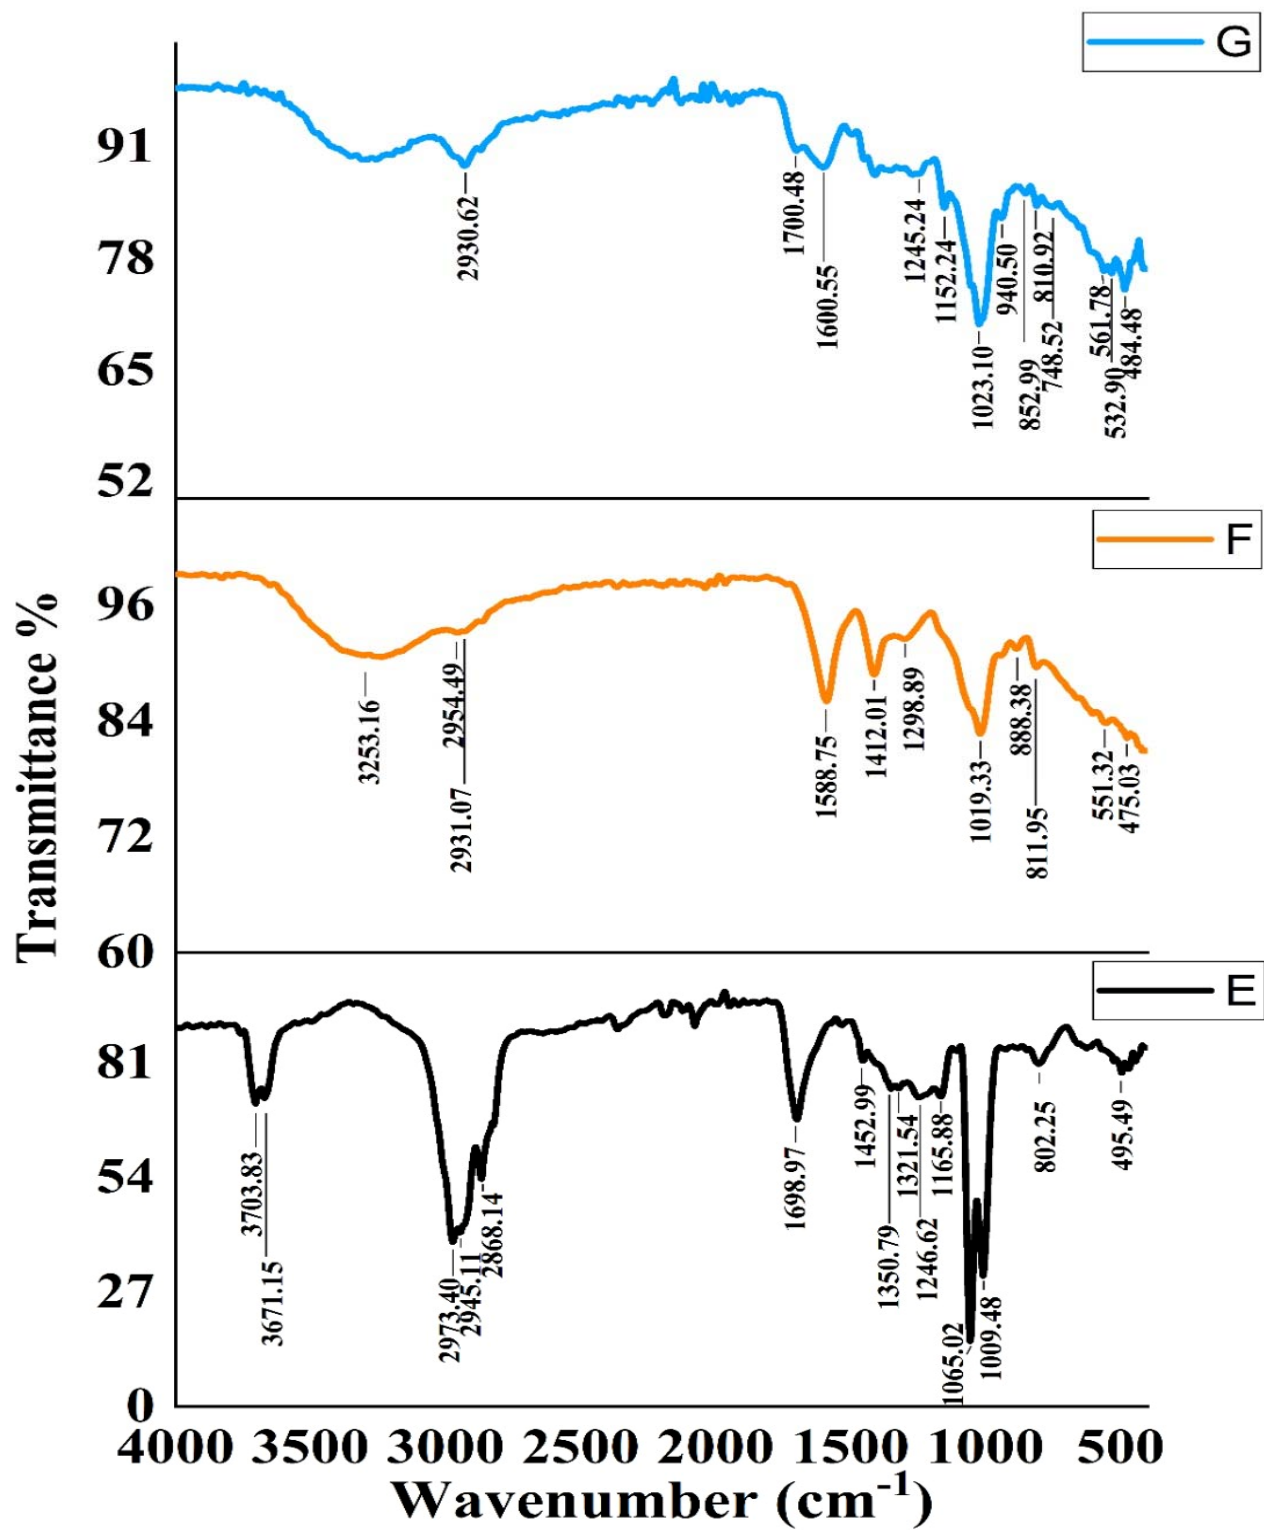

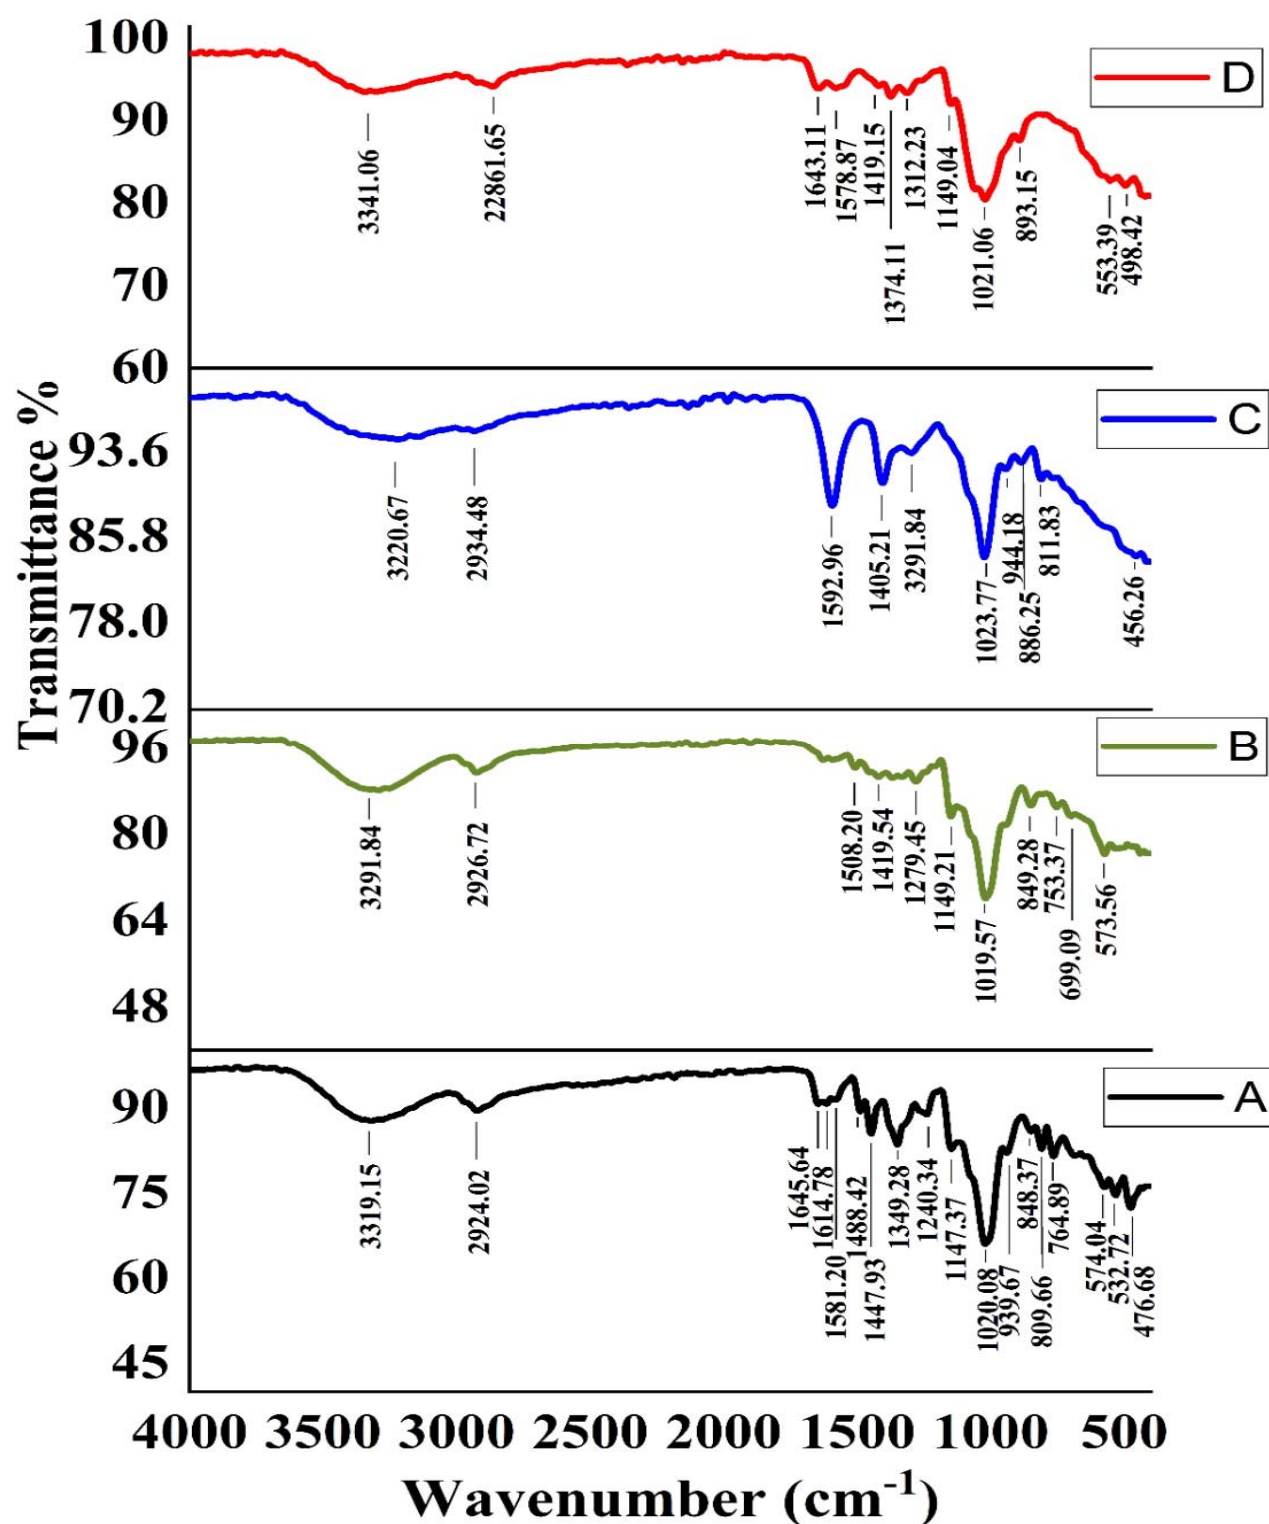

Figure S1 FT-IR spectra of the components of the complexes. A) MSZ and HP- $\beta$ -CD inclusion complex, B) curcumin and HP- $\beta$ -CD inclusion complex, C) Na-alginate, D) Chitosan, E) Eudragit® S-100, F) Optimized form physical mixture and G) Optimized beads formula.

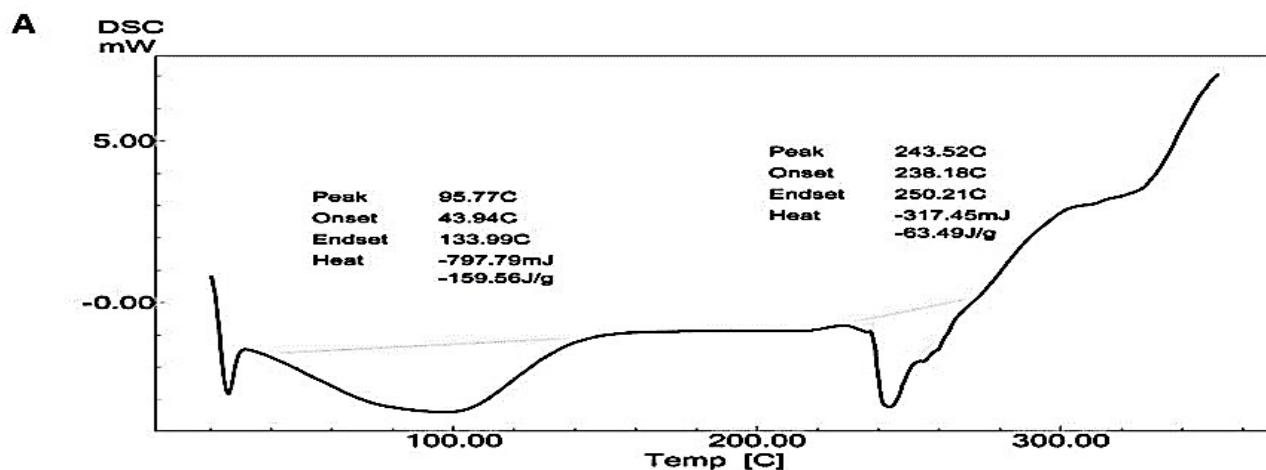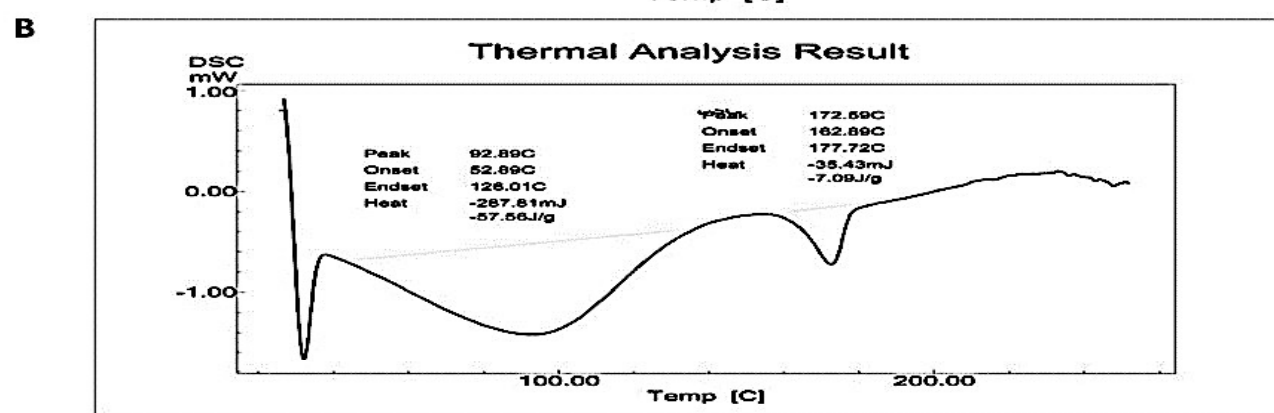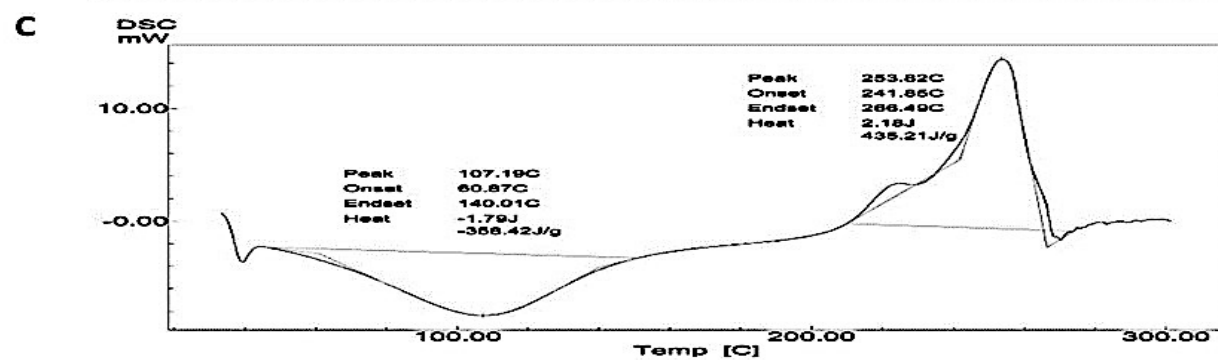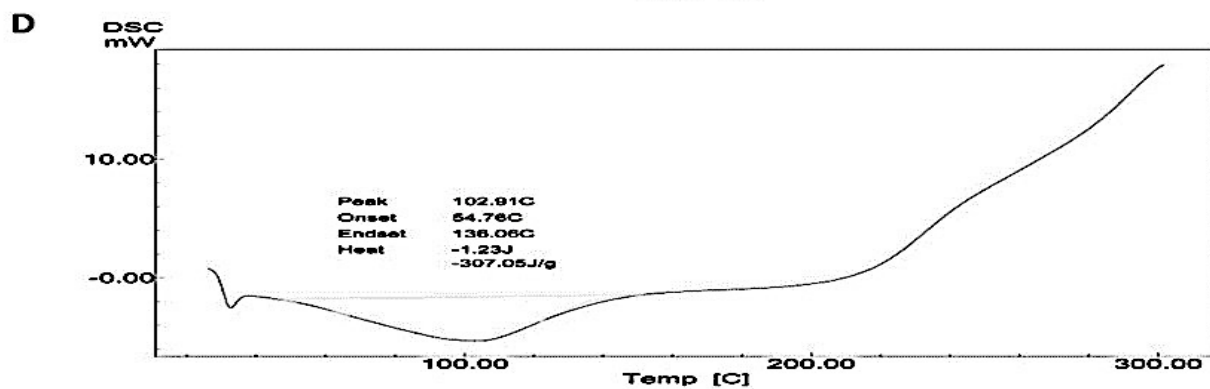

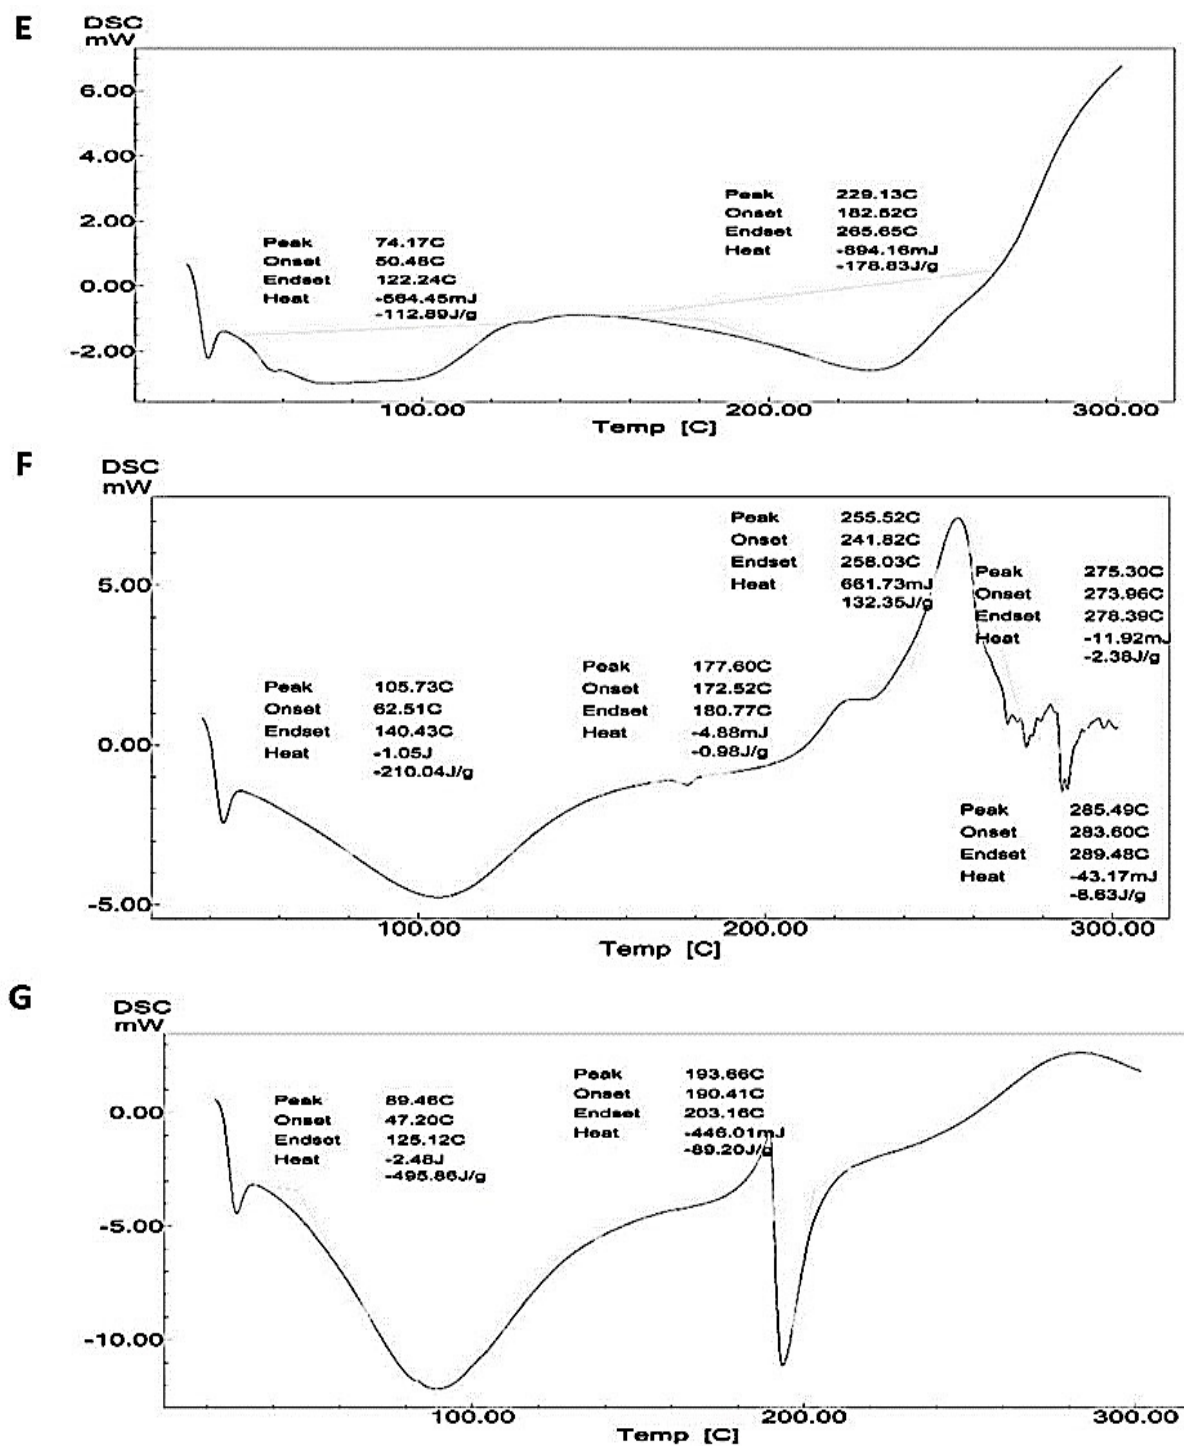

Figure S2. DSC spectra of the components of the complexes. A) MSZ-HP- $\beta$ -CD inclusion complex, B) curcumin-HP- $\beta$ -CD inclusion complex, C) Na-alginate, D) Chitosan, E) Eudragit® S-100, F) Optimized form a physical mixture and G) Optimized beads formula.

A) Data Set: placebo - RawData

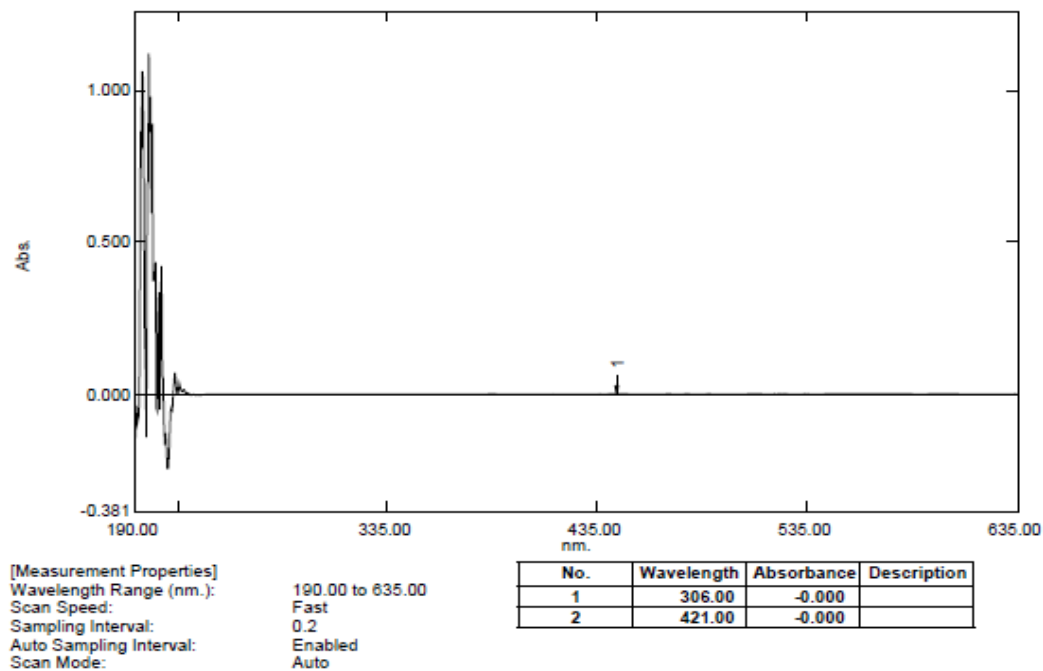

B) Data Set: System suitability 01 - RawData

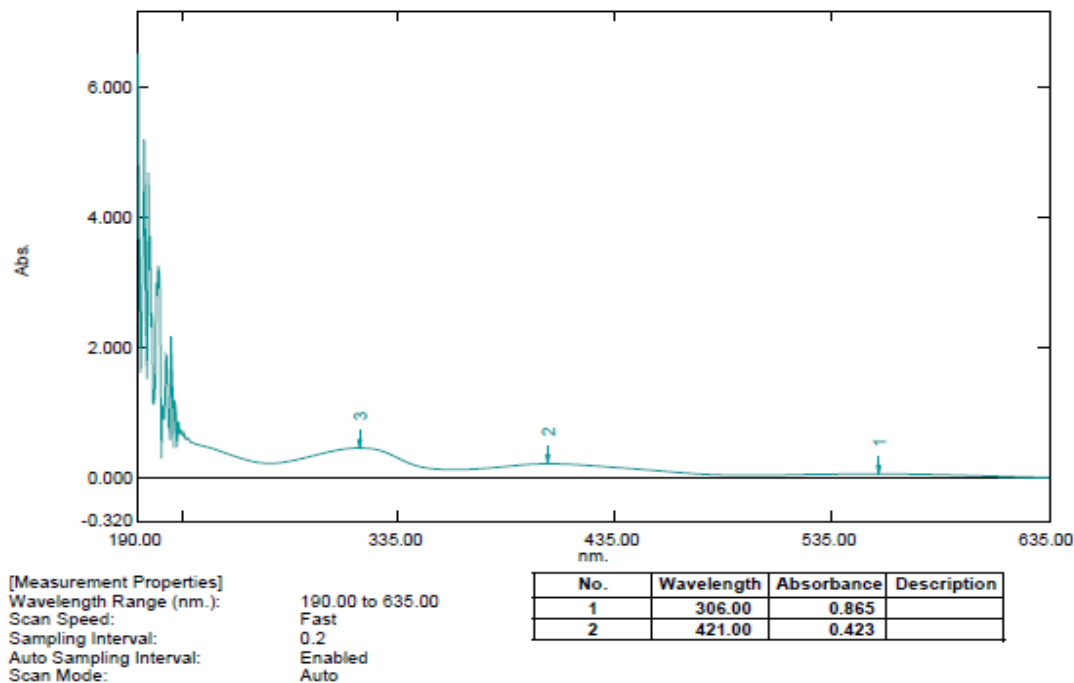

Figure S3. A) UV-Vis spectrum of beads plain formula with measurements at 306 and 421nm showing no absorbance. B) Standard mixture of MSZ and CUR for comparison.

A)

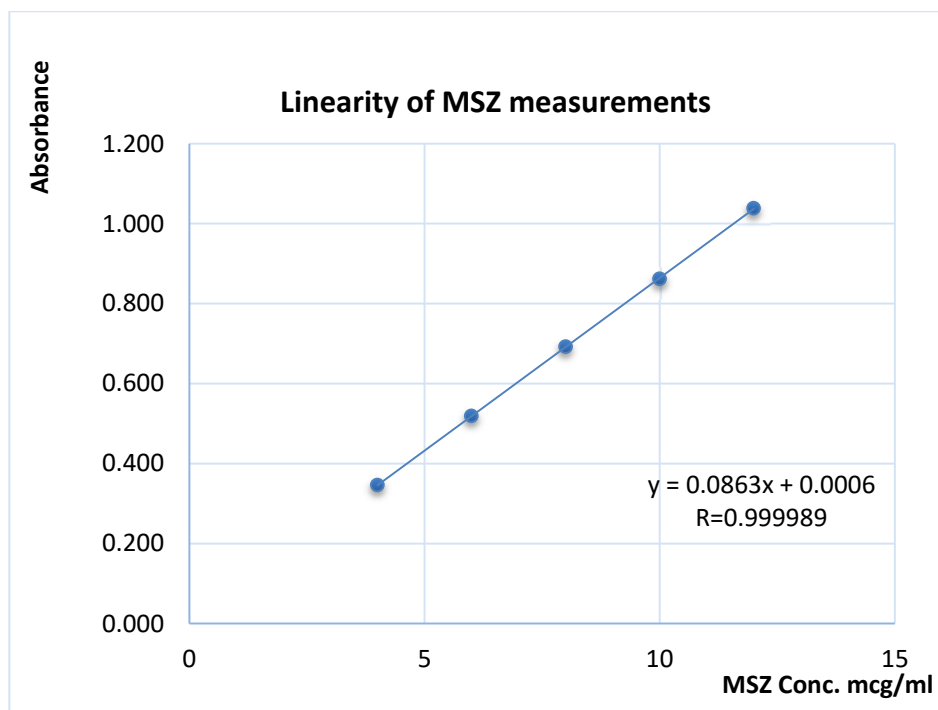

B)

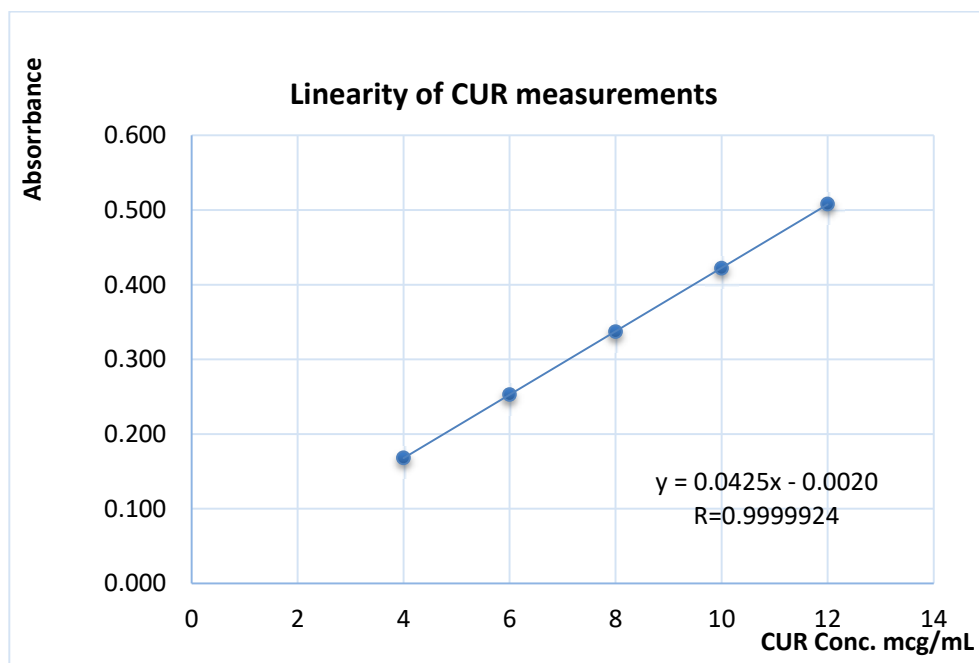

Figure S4. A) Linearity of MSZ UV-Vis Measurements at 306nm, B) Linearity of CUR UV-Vis Measurements at 421nm
